# Supplementary material for: Higher Atherogenic Index of Plasma Is Associated with Hyperuricemia: A National Longitudinal Study
Source: Hindawi journal article supplement (doi:10.1155/2024/4002839), 2024-02-19
Supplement: f1 [file 4002839.f1.zip]

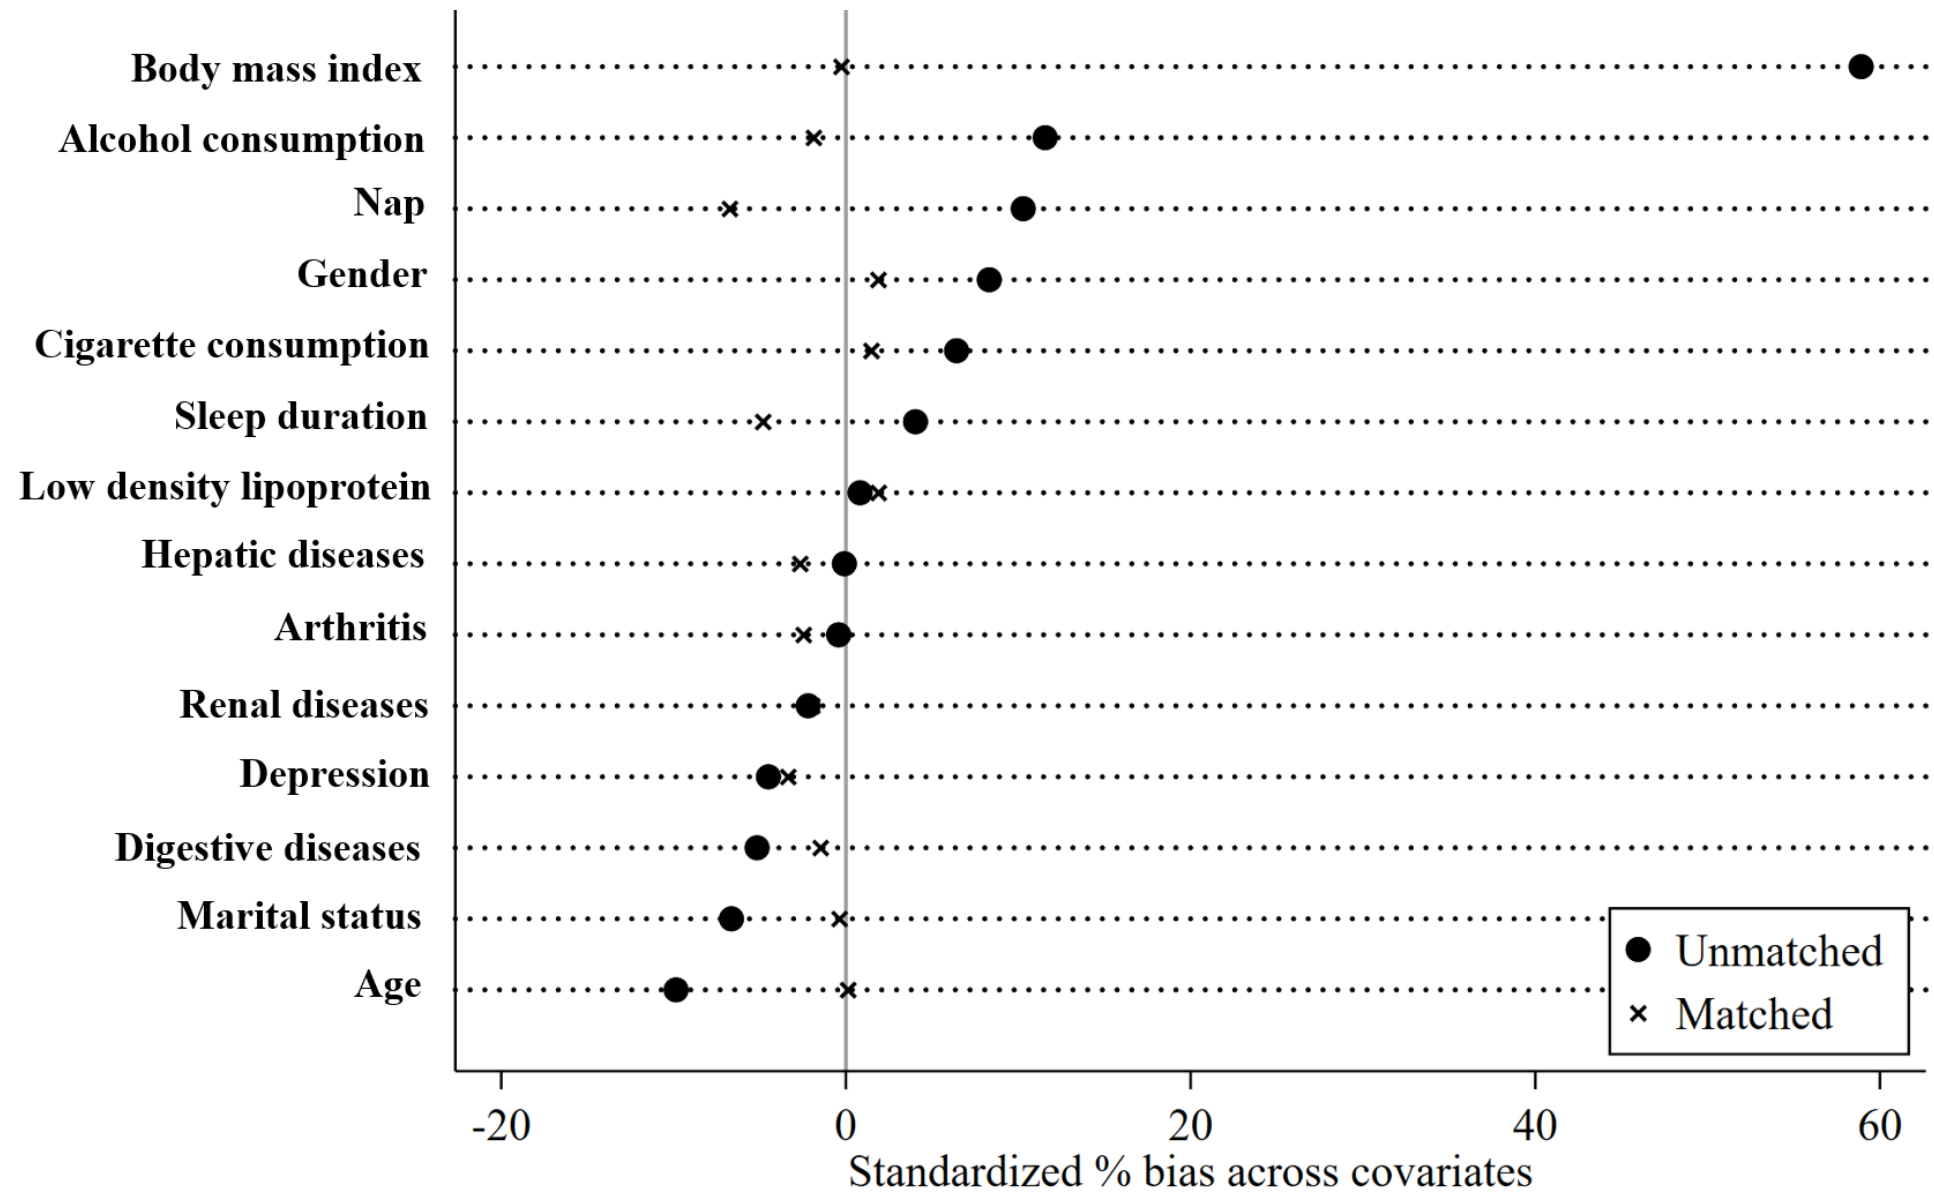

Supplemental figure1 Standardized bias across covariates in the cross-sectional analysis All the standardized bias was less than 10%.

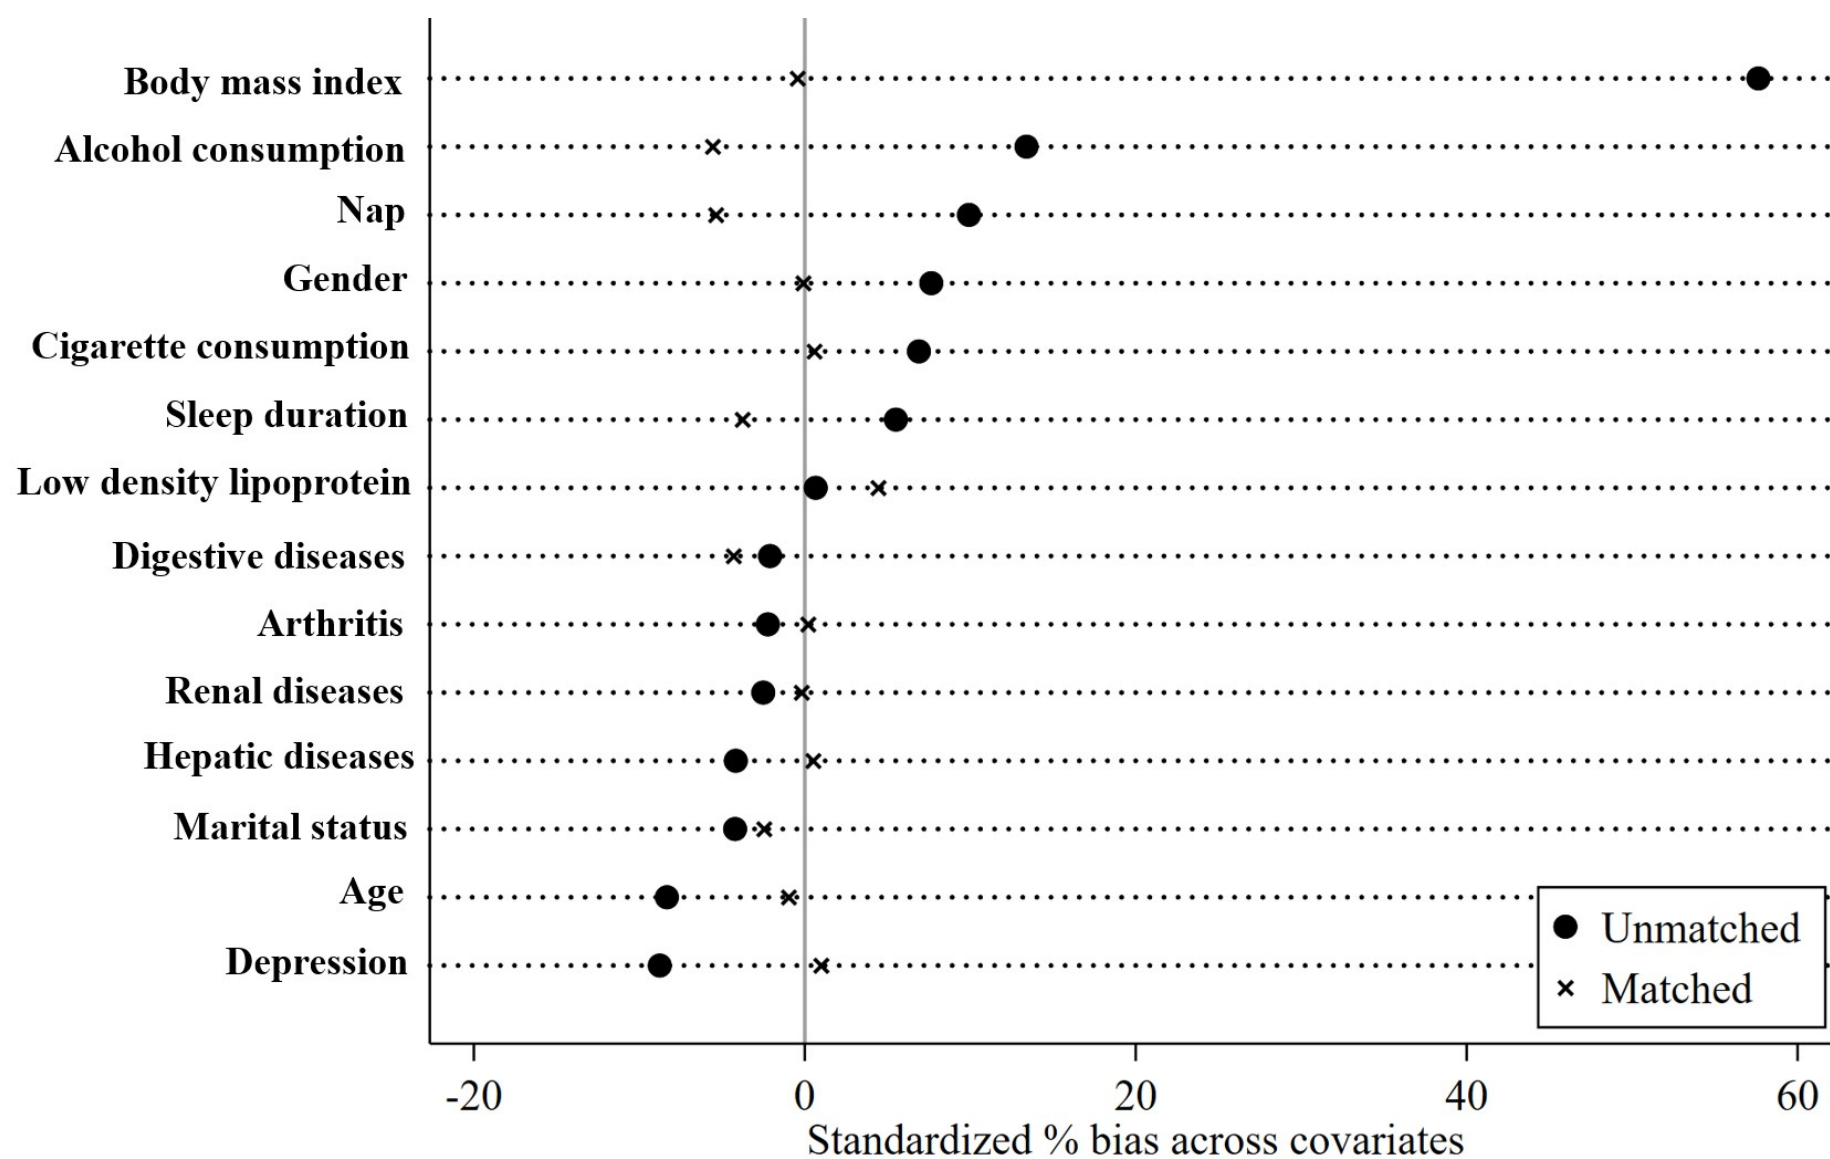

Supplemental figure2 Standardized bias across covariates in the longitudinal analysis All the standardized bias was less than 10%.
